# Supplementary material for: Impact of COVID-19 on Endoscopy Training: Perspectives from a Global Survey of Program Directors and Endoscopy Trainers
Source: PubMed Central journal article supplement — Clin Endosc. 2021 Sep 30;54(5):678–87. doi: 10.5946/ce.2021.140 (PMC8505182; doi:10.5946/ce.2021.140), 2021-09-30
Supplement: ce-2021-140-suppl1.pdf [file ce-2021-140-suppl1.pdf]

**Supplementary Material 1.** Survey questions**I. BASIC INFORMATION ABOUT YOU AND YOUR GI TRAINING PROGRAM**

1. What is your role in the GI training program? [Check one]
  - a) Program Director (PD)/Endoscopy Training Director Advanced Endoscopy Training Director
  - b) Teaching faculty
  - c) Part-time teaching faculty Other [Free text]
2. How are you involved in endoscopy training?\*[ Check all that apply]
  - a) I teach general GI procedures to trainees (EGD, colonoscopy, etc.)
  - b) I teach advanced endoscopy to trainees (ERCP, EUS, etc.).
  - c) I teach endoscopy part-time (for example, in private practice) I do not teach endoscopy.
3. Which country is your program located in? [Free text]
4. Which city is your program located in? [Free text]
5. What is the total number of general GI fellows (trainees) in your program? [Enter number]
6. What is the duration of your general GI training program over the years? [Enter number] Do you have an advanced endoscopy fellowship program? [Y/N]
7. How many advanced endoscopy trainees do you have in your program? [Enter number] How many faculty members in your program teach GI fellows? [Enter number]
8. What is the training setting for your program? [Check one or more]
  - a) Academic/University-based Hospital
  - b) Community with Academic Affiliation Community hospital
  - c) Other [Free text]
9. Has the COVID-19 pandemic affected the ANY aspect of GI fellowship training in your program? [Check one]
 

Yes [Survey continues]

Partially (trainees from other programs stopped rotating) [Survey continues]

**No [Survey stops]**

**II. IMPACT ON ENDOSCOPY TRAINING**

10. PRIOR to the COVID-19 pandemic, how many procedures were trainees performing on average per week? [Check one]
 

0-5, 6-10, 11-15, 16-20, 21-25, ≥26
11. PRIOR to the COVID-19 pandemic: What % of all endoscopy procedures had trainee participation? [Check one]
 

0-25%, 26-50%, 51-75%, 76-100%
12. Have your trainees been allowed to perform ANY endoscopy procedures during the COVID-19 pandemic? [Y/N]
 

Yes [Continue section]

**No [Prompt new question]**
13. Why were trainees not allowed to perform any endoscopy procedures?\*[ check all that applies].
  - a) National policy or society guidelines Hospital policy
  - b) Decision by division Decision by PD Shortage of PPEs
  - c) Shortage of COVID-19 testing
  - d) Trainees assigned to different roles (assist with COVID-19 demands). Other [Free text]

**[After this question, skip to the purple question below]**
14. DURING the COVID-19 pandemic, how many procedures were trainees performing on average per week? [Check one]
 

0-5, 6-10, 11-15, 16-20, 21-25, 26+
15. DURING the COVID-19 pandemic, what % of all endoscopy procedures had trainee participation? [Check one]
 

0-25%, 26-50%, 51-75%, 76-100%

16. How did the COVID-19 pandemic impact the number of procedures performed by trainees per week overall? [Check one column]

- EGD, Colonoscopy, ERCP, EUS
- No change Decreased by 1–25%
- Decreased by 25–50%
- Decreased by 51–75%
- Decreased by 76–99%
- None of these were performed by trainees during the COVID-19 pandemic
- N/A - trainees never performed these at our program

|  |
|--|
|  |
|  |
|  |
|  |
|  |
|  |
|  |

17. What were the causes of reduced endoscopy performed by trainees during the COVID-19 pandemic?\* [Check all that apply]

- a) Decreased volume of procedures: National policy or society guidelines b) Decision by hospital or division Decision by PD
- c) Shortage of PPEs
- d) Shortage of COVID-19 testing Shortage of negative pressure rooms
- e) Trainees assigned to different roles (assisting with COVID-19 demands)
- f) Illness amongst faculty or trainees
- g) N/A: no reduction in procedures performed by trainees. Other [Free text]

18. Were trainees allowed to perform procedures on COVID-19 POSITIVE patients? [check one]

Yes

No [prompt new question]

19. Why were trainees not allowed to perform procedures on COVID-19 POSITIVE patients?\* [Check all that apply]

- a) National policy or society guidelines Hospital policy
- b) Decision by division Decision by PD Shortage of PPEs
- c) Shortage of COVID-19 testing Other [Free text]

20. What are the other COVID-19 factors that affect teaching during endoscopy procedures?\* [Check all that apply]

- a) None
- b) Time pressure to complete procedures quickly
- c) More likely to take scope from fellow
- d) More difficult to interact due to distancing and PPEs More complex or difficult procedures
- e) Pressure from nursing, anesthesiologist, or other staffing Other [Free text]

21. What steps were taken to address the impact of the COVID-19 pandemic on endoscopy training for fellows?\* [Check all that apply]

- a) None
- b) Flexibility in trainee schedules
- c) Allowing trainees to work with multiple faculty members
- d) Allowing trainees to scope at other hospitals/sites
- e) Use of endoscopy simulator Online or virtual teaching
- f) Other [Free text]

22. Do you think the COVID-19 pandemic will impact your senior fellows' preparation for performing endoscopy independently after graduation? [Check one]

- a) No
- b) Maybe [Free text]
- c) Yes, but will likely graduate as planned Yes, may need to extend training
- d) Yes, senior fellows were graduated early due to COVID-19 pandemic demands
- e) As an educator, did you feel that endoscopy teaching was supported by your program during the COVID-19 pandemic? [check one]
- f) Yes, endoscopy teaching was supported by my program
- g) Neutral, I was left to decide how to approach endoscopy teaching No, priorities were shifted away from endoscopy teaching

### III. RESPONSE TO COVID-19

23. How many confirmed COVID-19 cases have been admitted to your hospital to date? [choose one]

- 0, 1–10, 11–50, 51–100, 101–250, 251–500, >500

24. Have trainees and faculty received formal training on how to care for COVID-19 patients? [Check one]

- Yes
- No
- I don't know

25. Have trainees and faculty received formal training on how to appropriately use personal protective equipment (PPE)? [Check one]

- Yes
- No
- I don't know

26. Did trainees express concerns regarding their safety and risk of exposure to COVID-19?  
Yes  
No  
I don't know
27. Have any of your trainees tested positive for COVID-19? (optional) (Check one)  
Yes  
No  
I don't know
28. Have any of your teaching faculty tested positive for COVID-19? (optional) (Check one)  
Yes  
No  
I don't know
29. What factor had the greatest impact on endoscopy training during the COVID-19 pandemic? [Check one]  
PPE shortages  
Suspension of elective procedures  
Trainees assigned to cover ICU/ward teams. Endoscopy training was minimally impacted in our unit.  
Other [free text]
30. Does your program have education focused on helping trainees cope with stress from COVID-19 and improving their well-being?  
Yes  
No  
I don't know
31. What steps have been taken to physically distance trainees?\* [Check all that apply]  
Minimizing the number of trainees in the office  
Moving trainees to different sites  
Use of telemedicine and virtual conferencing  
Limiting rounds on the wards  
Staggered schedules for trainees  
Other [free text]
32. Have trainees been asked to assume roles outside the GI?\* [Check all that apply]  
No  
Maybe  
Yes, trainees were asked to volunteer as ER providers  
Yes, trainees were required to act as ER providers.  
Yes, trainees asked to volunteer as hospitalists (internal medicine)  
Yes, trainees were required to act as hospitalists (internal medicine).  
Yes, trainees asked to volunteer as intensivists (ICU)  
Yes, trainees required to act as intensivists (ICU)  
Other [Free text]
33. What steps have been taken by your program to avoid excessive work hours for trainees?\* [Check all that apply]  
Shortened rotations (for example, one week on and one week off)  
Faculty taking on a larger role in patient care  
Regular discussions with trainees  
No steps taken  
Online resources  
Wellness activities (for example, virtual happy hour)  
Increased monitoring of work hours  
Other [Free text]
34. What has been the overall impact of the COVID-19 pandemic on endoscopy training? [Choose one]  
Strongly negative impact [Free text to explain]  
Negative impact [Free text to explain]  
No impact [Free text to explain]  
Positive impact [Free text to explain]  
Strongly positive impact [Free text to explain]
35. Any other comments on the impact of COVID-19 on your training program? [Free text]  
*Questions# 2, 13, 17, 19-21, 31-33 are marked with an \* and have more than one option that can be selected*
