# Supplementary material for: Impact of COVID-19 on Endoscopy Training: Perspectives from a Global Survey of Program Directors and Endoscopy Trainers
Source: PubMed Central journal article supplement — Clin Endosc. 2021 Sep 30;54(5):678–87. doi: 10.5946/ce.2021.140 (PMC8505182; doi:10.5946/ce.2021.140), 2021-09-30
Supplement: ce-2021-140-suppl2.pdf [file ce-2021-140-suppl2.pdf]

Supplementary Material 2. Email invitation

Dear colleague: May 17, 2020

**Invitation to participate in a Multi0national survey to measure the impact of Covid-19 on Endoscopy training across the world.**

As we all work to adapt and respond to the challenges imposed on our endoscopy training programs by the COVID-19 pandemic, we recognize that our ability to teach endoscopy to our trainees has been greatly impacted. In collaboration with a multi-national group of dedicated endoscopy educators, we designed this survey to measure the impact of COVID-19 on endoscopy training and learn more about the actions taken to address new challenges to endoscopy training during the pandemic. Our goal is to survey training programs across the globe, and we sincerely hope you will take a few minutes to complete this brief and anonymous survey using the link below.

<https://forms.gle/mVYreYtF1roxFY2o8>

You have been personally selected to participate in this study because of your experience and interest in endoscopy training. However, if you feel that someone else at your hospital is better suited to complete this survey, please forward this email to the appropriate person.

Thank you very much for your time. We greatly appreciate your help with this study and know that your contribution will serve to benefit the global community of endoscopy educators and trainees.

Sincerely,



**Shivakumar Vignesh, MD.**, AGAF, FASGE, FACG

Principal Investigator: Gastroenterology Teaching faculty perspectives on COVIDC19 outbreak and impact on GI fellowship training

On behalf of the “**International Alliance of Academic Endoscopists**”  
representing 13 countries.

Ajay Verma, U.K. Alan Moss, Australia, Alejandro Piscocya, Peru Amna Subhan, Pakistan Bruno Martins, Brazil Christopher Huang, USA Christopher Khor, Singapore Damien Tan, Singapore David Wei0Chih Liao, Taiwan Edna Kamau, Kenya, Frank Tsai, USA Mohamed Alboraie, Egypt, Pezhman Alavinejad, Iran Robin Mendelsohn, USA Roland Valori, U.K. Shivakumar Vignesh, USA Trung Tran Quang, Vietnam
