# Supplementary material for: Impact of COVID-19 on Endoscopy Training: Perspectives from a Global Survey of Program Directors and Endoscopy Trainers
Source: PubMed Central journal article supplement — Clin Endosc. 2021 Sep 30;54(5):678–87. doi: 10.5946/ce.2021.140 (PMC8505182; doi:10.5946/ce.2021.140), 2021-09-30
Supplement: ce-2021-140-suppl3.pdf [file ce-2021-140-suppl3.pdf]

**Supplementary Material 3.** WEO Executive Committee approval

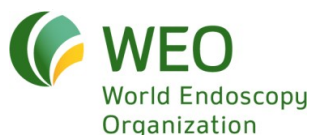

**PRESIDENT**

Fabian Emura Bogota, Colombia

June 16, 2020

To whom it may concern

WEO takes pride to be the voice of world endoscopy. Our mission is to be the world leader in endoscopic education while promoting high standards and quality in endoscopy.

As part of this mission, WEO has recently supported a survey to assess perspective of teaching faculty on the impact of Covid-19 on endoscopy training, conducted by Dr Shivakumar Vignesh and his team. WEO Executive had reviewed the survey questionnaire, seen this to be ethical and appropriate to distribute this to WEO members with the specific objectives for the survey as disclosed, and granted approval to be disseminated to the core committees of WEO.

WEO is legally registered in Germany and all activities are aligned with the European Data Protection Act. Questions regarding the survey and/or WEO can be directed to the WEO secretariat at [secretariat@worldendo.org](mailto:secretariat@worldendo.org)

Sincerely

A handwritten signature in black ink, appearing to read 'Douglas Faigel', written over a light blue horizontal line.

Douglas Faigel  
WEO Secretary General

**PRESIDENT ELECT**

Hisao Tajiri Tokyo,  
Japan

**PAST PRESIDENT**

Jean-Francois Rey  
St. Laurent du Var,  
France

**SECRETARY  
GENERAL**

Douglas Faigel  
Scottsdale, USA

**TREASURER**

Dong-Wan Seo Seoul,  
South Korea

**ZONE PRESIDENTS**

Seigo Kitano (APSDE)  
Mário Dinis-Ribeiro  
(ESGE)  
Asadur  
Tchekmedyan (SIED)

**COMMITTEE CHAIRS**

**Colorectal Cancer  
Screening**  
Evelien Dekker,  
Netherlands

**Documentation and  
Standardization**

Thomas de Lange,  
Norway Koji  
Matsuda, Japan

**Education**

Douglas Faigel, USA

**Research**

Krish Rangunath, UK

**Supplementary Material 3.** (Continued)

**Standards of Practice and Publications**

Tibor Gyökeres, Hungary

**Surgical Endoscopy**

Philip Chiu, China

**Upper GI Cancer**

Mitsuhiro Fujishiro, Japan

**CONTACT**

WEO Executive Secretariat c/o Hamilton Services GmbH Landwehr Str. 9

80336 Munich, Germany

Tel. +49-89-9077936-12

Fax +49-89-9077936-20

[secretariat@worldendo.org](mailto:secretariat@worldendo.org) [www.worldendo.org](http://www.worldendo.org)

**DOMICILE**

WEO World Endoscopy Organization e.V.

VR 204927

Munich, Germany

Tax ID 143/224/40899
