# Supplementary material for: Impact of COVID-19 on Endoscopy Training: Perspectives from a Global Survey of Program Directors and Endoscopy Trainers
Source: PubMed Central journal article supplement — Clin Endosc. 2021 Sep 30;54(5):678–87. doi: 10.5946/ce.2021.140 (PMC8505182; doi:10.5946/ce.2021.140), 2021-09-30
Supplement: ce-2021-140-suppl4.pdf [file ce-2021-140-suppl4.pdf]

**Supplementary Material 4.** Impact of COVID-19 on endoscopy training for training faculty compared to program directors

| Survey questions                                                                                                               | Teaching faculty (%) | Program director (%) | <i>p</i> value |
|--------------------------------------------------------------------------------------------------------------------------------|----------------------|----------------------|----------------|
| Has the COVID-19 pandemic affected ANY aspect of GI fellowship training at your program? ( <i>n</i> =299)                      |                      |                      |                |
| No                                                                                                                             | 8 (6.7)              | 12 (6.7)             | 0.99           |
| Yes                                                                                                                            | 112 (93.3)           | 167 (93.3)           |                |
| PRIOR to the COVID-19 pandemic, how many procedures were trainees performing on average per week per trainee? ( <i>n</i> =279) |                      |                      |                |
| 0–5                                                                                                                            | 22 (19.6)            | 41 (24.6)            | 0.95           |
| 6–10                                                                                                                           | 4 (3.6)              | 6 (3.6)              |                |
| 11–15                                                                                                                          | 27 (24.1)            | 38 (22.8)            |                |
| 16–20                                                                                                                          | 24 (21.4)            | 34 (20.4)            |                |
| 21–25                                                                                                                          | 16 (14.3)            | 24 (14.4)            |                |
| ≥26                                                                                                                            | 19 (17)              | 24 (14.4)            |                |
| Have your trainees been allowed to perform ANY endoscopy procedures during the COVID-19 pandemic? ( <i>n</i> =279)             |                      |                      |                |
| Yes                                                                                                                            | 78 (69.6)            | 112 (67.1)           | 0.65           |
| No                                                                                                                             | 34 (30.4)            | 55 (32.9)            |                |
| What was the primary reason for trainees not being allowed to perform any endoscopy procedures? ( <i>n</i> =89)                |                      |                      |                |
| Decision by division/PD                                                                                                        | 8 (23.5)             | 20 (36.4)            | 0.17           |
| Hospital policy                                                                                                                | 5 (14.7)             | 15 (27.3)            |                |
| National policy or society guidelines                                                                                          | 4 (11.8)             | 6 (10.9)             |                |
| Our hospital was shut down to become isolation                                                                                 | 1 (2.9)              | 1 (1.8)              |                |
| Shortage of PPEs                                                                                                               | 7 (20.6)             | 3 (5.5)              |                |
| Trainees assigned to different roles (assist with COVID-19 demands)                                                            | 9 (26.5)             | 10 (18.2)            |                |
| DURING the COVID-19 pandemic, how many procedures were trainees performing on average per week per trainee? ( <i>n</i> =190)   |                      |                      |                |
| 0–5                                                                                                                            | 50 (64.1)            | 57 (50.9)            | 0.31           |
| 6–10                                                                                                                           | 17 (21.8)            | 31 (27.7)            |                |
| 11–15                                                                                                                          | 5 (6.4)              | 16 (14.3)            |                |
| 16–20                                                                                                                          | 3 (3.8)              | 2 (1.8)              |                |
| 21–25                                                                                                                          | 1 (1.3)              | 1 (0.9)              |                |
| ≥26                                                                                                                            | 2 (2.6)              | 5 (4.5)              |                |
| PRIOR to the COVID-19 pandemic, what % of all endoscopy procedures had trainee participation? ( <i>n</i> =279)                 |                      |                      |                |
| 0–25%                                                                                                                          | 23 (20.5)            | 17 (10.2)            | 0.05           |
| 26–50%                                                                                                                         | 29 (25.9)            | 47 (28.1)            |                |
| 51–75%                                                                                                                         | 37 (33)              | 52 (31.1)            |                |
| 76–100%                                                                                                                        | 23 (20.5)            | 51 (30.5)            |                |
| DURING the COVID-19 pandemic, what % of all endoscopy procedures had trainee participation? ( <i>n</i> =190)                   |                      |                      |                |
| 0–25%                                                                                                                          | 43 (55.1)            | 50 (44.6)            | 0.34           |
| 26–50%                                                                                                                         | 13 (16.7)            | 30 (26.8)            |                |
| 51–75%                                                                                                                         | 15 (19.2)            | 20 (17.9)            |                |
| 76–100%                                                                                                                        | 7 (9.0)              | 12 (10.7)            |                |
| Were trainees allowed to perform procedures on COVID-19 positive patients? ( <i>n</i> =299)                                    |                      |                      |                |
| Yes                                                                                                                            | 30 (25)              | 43 (24)              | 0.91           |
| No                                                                                                                             | 48 (40)              | 69 (38.5)            |                |
| Not answered                                                                                                                   | 42 (35)              | 67 (37.4)            |                |

**Supplementary Material 4.** (Continued)

| Survey questions                                                                                                                         | Teaching faculty (%) | Program director (%) | <i>p</i> value |
|------------------------------------------------------------------------------------------------------------------------------------------|----------------------|----------------------|----------------|
| What one factor had the greatest impact on endoscopy training during the COVID-19 pandemic? ( <i>n</i> =190)                             |                      |                      |                |
| Endoscopy training was minimally affected in our unit                                                                                    | 2 (2.6)              | 4 (3.6)              | 0.95           |
| PPE shortage                                                                                                                             | 7 (9.0)              | 11 (9.8)             |                |
| Suspension of elective procedures                                                                                                        | 63 (80.8)            | 90 (80.4)            |                |
| Trainees assigned to cover ICU/ward teams                                                                                                | 6 (7.7)              | 7 (6.3)              |                |
| As an educator, did you feel endoscopy teaching was supported by your program during the COVID-19 pandemic? ( <i>n</i> =279)             |                      |                      |                |
| Yes, endoscopy teaching was supported by my program                                                                                      | 37 (33)              | 59 (35.3)            | 0.52           |
| No, priorities were shifted away from endoscopy teaching                                                                                 | 35 (31.3)            | 59 (35.3)            |                |
| Neutral, I was left to decide how to approach endoscopy teaching                                                                         | 40 (35.7)            | 49 (29.3)            |                |
| How many confirmed COVID-19 cases have been admitted to your hospital to date? ( <i>n</i> =279)                                          |                      |                      |                |
| <50                                                                                                                                      | 42 (35.0)            | 65 (36.3)            | 0.41           |
| 51–100                                                                                                                                   | 14 (12.5)            | 14 (8.4)             |                |
| 101–250                                                                                                                                  | 20 (17.9)            | 27 (16.2)            |                |
| 251–500                                                                                                                                  | 16 (14.3)            | 19 (11.4)            |                |
| >500                                                                                                                                     | 20 (17.9)            | 41 (24.6)            |                |
| Did trainees express concerns regarding their safety and risk of exposure to COVID-19? ( <i>n</i> =279)                                  |                      |                      |                |
| Yes                                                                                                                                      | 80 (71.4)            | 128 (76.6)           | 0.43           |
| No                                                                                                                                       | 20 (17.9)            | 28 (16.8)            |                |
| I don't know                                                                                                                             | 12 (10.7)            | 11 (6.6)             |                |
| Have any of your trainees tested positive for COVID-19? ( <i>n</i> =279)                                                                 |                      |                      |                |
| Yes                                                                                                                                      | 20 (17.9)            | 30 (18)              | 0.01           |
| No                                                                                                                                       | 77 (68.8)            | 129 (77.2)           |                |
| I don't know                                                                                                                             | 15 (13.4)            | 6 (3.6)              |                |
| Have any of your teaching faculty tested positive for COVID-19? ( <i>n</i> =279)                                                         |                      |                      |                |
| Yes                                                                                                                                      | 31 (27.7)            | 50 (29.9)            | 0.77           |
| No                                                                                                                                       | 69 (61.6)            | 105 (62.9)           |                |
| I don't know                                                                                                                             | 11 (9.8)             | 11 (6.6)             |                |
| COVID-19 pandemic will impact your senior fellows' preparation for performing endoscopy independently after graduation? ( <i>n</i> =279) |                      |                      |                |
| Maybe                                                                                                                                    | 8 (7.1)              | 13 (7.8)             | 0.41           |
| No                                                                                                                                       | 29 (25.9)            | 52 (31.1)            |                |
| Yes, but will likely graduate as planned                                                                                                 | 42 (37.5)            | 61 (36.5)            |                |
| Yes, may need to extend training                                                                                                         | 31 (27.7)            | 41 (24.6)            |                |
| Yes, senior fellows were graduated early due to COVID-19 pandemic demands                                                                | 2 (1.8)              | 0                    |                |
| Have trainees been asked to assume roles outside of GI? ( <i>n</i> =279)                                                                 |                      |                      |                |
| Yes                                                                                                                                      | 59 (52.7)            | 92 (55.1)            | 0.04           |
| No                                                                                                                                       | 43 (38.4)            | 71 (42.5)            |                |
| Maybe                                                                                                                                    | 10 (8.9)             | 4 (2.4)              |                |
| What has been the overall impact of the COVID-19 pandemic on the endoscopy training? ( <i>n</i> =279)                                    |                      |                      |                |
| Negative impact                                                                                                                          | 72 (64.3)            | 103 (61.7)           | 0.72           |
| Strongly negative impact                                                                                                                 | 32 (28.6)            | 52 (31.1)            |                |
| No impact                                                                                                                                | 7 (6.3)              | 8 (4.8)              |                |
| Positive impact                                                                                                                          | 1 (0.9)              | 4 (2.4)              |                |

**Supplementary Material 4.** (Continued)

| Survey questions                                                                                                                               | Teaching faculty (%) | Program director (%) | <i>p</i> value |
|------------------------------------------------------------------------------------------------------------------------------------------------|----------------------|----------------------|----------------|
| Trainees and faculty received formal training on how to care for COVID-19 patients ( <i>n</i> =279)                                            |                      |                      |                |
| Yes                                                                                                                                            | 86 (76.8)            | 132 (79.0)           | 0.15           |
| No                                                                                                                                             | 17 (15.2)            | 30 (18.0)            |                |
| I don't know                                                                                                                                   | 9 (8.0)              | 5 (3.0)              |                |
| Trainees and faculty received formal training on how to appropriately use personal protective equipment (PPEs) ( <i>n</i> =279)                |                      |                      |                |
| Yes                                                                                                                                            | 99 (88.4)            | 151 (90.4)           | 0.42           |
| No                                                                                                                                             | 8 (7.1)              | 13 (7.8)             |                |
| I don't know                                                                                                                                   | 5 (4.5)              | 3 (1.8)              |                |
| What steps were taken to address the impact of COVID-19 pandemic on endoscopy training for fellows? ( <i>n</i> =279)                           |                      |                      |                |
| Allowing trainees to scope at other hospitals/sites                                                                                            | 6 (5.4)              | 12 (7.2)             | 0.54           |
| Allowing trainees to work with multiple faculty members                                                                                        | 20 (17.9)            | 56 (33.5)            | 0.004          |
| Online or virtual teaching                                                                                                                     | 45 (40.2)            | 83 (49.7)            | 0.11           |
| Conserving endoscopy procedures for existing and senior fellows                                                                                | 110 (98.2)           | 166 (99.4)           | 0.56           |
| Use of endoscopy simulators                                                                                                                    | 14 (12.5)            | 15 (9.0)             | 0.34           |
| Extension on the training duration                                                                                                             | 1 (0.9)              | 0                    | 0.40           |
| Flexibility in trainee schedules                                                                                                               | 55 (49.1)            | 102 (61.1)           | 0.04           |
| Gradual easing of restrictions                                                                                                                 | 2 (1.8)              | 0                    | 0.16           |
| Improvement in testing and adequate PPE resulted in the resumption of training                                                                 | 1 (0.9)              | 0                    | 0.40           |
| None of above                                                                                                                                  | 27 (24.1)            | 19 (11.4)            | 0.005          |
| The program has developed education focused on helping trainees cope with stress from COVID-19 and improving their well-being ( <i>n</i> =279) |                      |                      |                |
| Yes                                                                                                                                            | 53 (47.3)            | 86 (51.5)            | 0.61           |
| No                                                                                                                                             | 42 (37.5)            | 62 (37.1)            |                |
| I don't know                                                                                                                                   | 17 (15.2)            | 19 (11.4)            |                |
| What steps have been taken by your program to avoid excessive work hours for trainees? ( <i>n</i> =279)                                        |                      |                      |                |
| Faculty taking on larger roles in patient care                                                                                                 | 14 (12.5)            | 13 (7.8)             | 0.19           |
| Increased monitoring of work hours & endorsed fewer working hours                                                                              | 39 (34.8)            | 51 (30.5)            | 0.45           |
| Online resources                                                                                                                               | 18 (16.1)            | 24 (14.4)            | 0.69           |
| Wellness activities (for example, virtual happy hour)                                                                                          | 31 (27.7)            | 69 (41.3)            | 0.02           |
| Regular discussions with trainees                                                                                                              | 21 (18.8)            | 34 (20.4)            | 0.74           |
| No step taken                                                                                                                                  | 50 (44.6)            | 70 (41.9)            | 0.65           |
| Shortened rotations (for example, one week on and one week off)                                                                                | 0                    | 1 (0.6)              | 0.99           |
| Theoretical and practical endoscopy teaching was postponed less hours                                                                          | 0                    | 1 (0.6)              | 0.41           |

COVID-19, the coronavirus disease of 2019; GI, gastroenterology; ICU, intensive care unit; PD, program director; PPE, personal protective equipment.
