# Supplementary material for: Impact of COVID-19 on Endoscopy Training: Perspectives from a Global Survey of Program Directors and Endoscopy Trainers
Source: PubMed Central journal article supplement — Clin Endosc. 2021 Sep 30;54(5):678–87. doi: 10.5946/ce.2021.140 (PMC8505182; doi:10.5946/ce.2021.140), 2021-09-30
Supplement: ce-2021-140-suppl5.pdf [file ce-2021-140-suppl5.pdf]

**Supplementary Material 5.** The Impact of COVID-19 on Endoscopy Training and Responses from Programs Classified by WHO Region (*n*=299)

| Survey questions                                                                                                             | Americas;<br><i>n</i> =135 | Southeast<br>Asia;<br><i>n</i> =16 | Europe;<br><i>n</i> =44 | Eastern<br>Mediterranean<br>& African<br>Regions;<br><i>n</i> =41 | Western<br>Pacific;<br><i>n</i> =63 | <i>p</i> -value |
|------------------------------------------------------------------------------------------------------------------------------|----------------------------|------------------------------------|-------------------------|-------------------------------------------------------------------|-------------------------------------|-----------------|
| Has the COVID-19 pandemic affected ANY aspect of GI fellowship training at your program? ( <i>n</i> =299)                    |                            |                                    |                         |                                                                   |                                     |                 |
| • No                                                                                                                         | 3 (2.2)                    | 0                                  | 2 (4.5)                 | 4 (9.8)                                                           | 11 (17.5)                           | 0.001           |
| • Yes                                                                                                                        | 132 (97.8)                 | 16 (100)                           | 42 (95.5)               | 37 (90.2)                                                         | 52 (82.5)                           |                 |
| Have your trainees been allowed to perform ANY endoscopy procedures during the COVID-19 pandemic? ( <i>n</i> =279)           |                            |                                    |                         |                                                                   |                                     |                 |
| • Yes                                                                                                                        | 101 (76.5)                 | 9 (56.3)                           | 19 (45.2)               | 24 (64.9)                                                         | 37 (71.2)                           | 0.003           |
| • No                                                                                                                         | 31 (23.5)                  | 7 (43.8)                           | 23 (54.8)               | 13 (35.1)                                                         | 15 (28.8)                           |                 |
| What was the primary reason for trainees not being allowed to perform any endoscopy procedures? ( <i>n</i> =89)              |                            |                                    |                         |                                                                   |                                     |                 |
| • Decision by division/PD                                                                                                    | 14 (45.2)                  | 3 (42.9)                           | 2 (8.7)                 | 7 (53.8)                                                          | 2 (13.3)                            | 0.005           |
| • Hospital policy                                                                                                            | 7 (22.6)                   | 1 (14.3)                           | 3 (13)                  | 1 (7.7)                                                           | 8 (53.3)                            |                 |
| • National policy or society guidelines                                                                                      | 1 (3.2)                    | 0                                  | 6 (26.1)                | 1 (7.7)                                                           | 2 (13.3)                            |                 |
| • Our hospital was shut down to become isolation                                                                             | 0                          | 0                                  | 0                       | 1 (7.7)                                                           | 1 (6.7)                             |                 |
| • Shortage of PPEs                                                                                                           | 3 (9.7)                    | 2 (28.6)                           | 3 (13)                  | 0                                                                 | 2 (13.3)                            |                 |
| • Trainees assigned to different roles (assist with COVID-19 demands)                                                        | 6 (19.4)                   | 1 (14.3)                           | 9 (39.1)                | 3 (23.1)                                                          | 0                                   |                 |
| Were trainees allowed to perform procedures on COVID-19 positive patients? ( <i>n</i> =299)                                  |                            |                                    |                         |                                                                   |                                     |                 |
| • Yes                                                                                                                        | 47 (34.8)                  | 1 (6.3)                            | 7 (15.9)                | 7 (17.7)                                                          | 11 (17.5)                           | 0.002           |
| • No                                                                                                                         | 54 (40)                    | 8 (50)                             | 12 (27.3)               | 17 (41.5)                                                         | 26 (41.3)                           |                 |
| • Not answered                                                                                                               | 34 (25.2)                  | 7 (43.8)                           | 25 (56.8)               | 17 (41.5)                                                         | 26 (41.3)                           |                 |
| What one factor had the greatest impact on endoscopy training during the COVID-19 pandemic? ( <i>n</i> =190)                 |                            |                                    |                         |                                                                   |                                     |                 |
| • Endoscopy training was minimally affected in our unit                                                                      | 0                          | 0                                  | 0                       | 1 (4.2)                                                           | 5 (13.5)                            |                 |
| • PPE shortage                                                                                                               | 8 (7.9)                    | 0                                  | 2 (10.5)                | 1 (4.2)                                                           | 7 (18.9)                            | <0.001          |
| • Suspension of elective procedures                                                                                          | 89 (88.1)                  | 8 (88.9)                           | 12 (63.2)               | 20 (83.3)                                                         | 24 (64.9)                           |                 |
| • Trainees assigned to cover ICU/ward teams                                                                                  | 4 (4.0)                    | 1 (11.1)                           | 5 (26.3)                | 2 (8.3)                                                           | 1 (2.7)                             |                 |
| As an educator, did you feel endoscopy teaching was supported by your program during the COVID-19 pandemic? ( <i>n</i> =279) |                            |                                    |                         |                                                                   |                                     |                 |
| • Yes, endoscopy teaching was supported by my program                                                                        | 61 (46.2)                  | 6 (37.5)                           | 3 (7.1)                 | 10 (27)                                                           | 16 (30.8)                           | <0.001          |
| • No, priorities were shifted away from endoscopy teaching                                                                   | 38 (28.8)                  | 0                                  | 28 (66.7)               | 17 (45.9)                                                         | 11 (21.2)                           |                 |
| • Neutral, I was left to decide how to approach endoscopy teaching                                                           | 33 (25)                    | 10 (62.5)                          | 11 (26.2)               | 10 (27)                                                           | 25 (48.1)                           |                 |

Supplementary Material 5. (Continued)

| Survey questions                                                                                                                    | Americas;<br>n=135 | Southeast<br>Asia;<br>n=16 | Europe;<br>n=44 | Eastern<br>Mediterranean<br>& African<br>Regions;<br>n=41 | Western<br>Pacific;<br>n=63 | p-value |
|-------------------------------------------------------------------------------------------------------------------------------------|--------------------|----------------------------|-----------------|-----------------------------------------------------------|-----------------------------|---------|
| How many confirmed COVID-19 cases have been admitted to your hospital to date? (n=279)                                              |                    |                            |                 |                                                           |                             |         |
| • ≤ 50                                                                                                                              | 27 (20.5)          | 9 (56.3)                   | 11 (26.2)       | 22 (59.5)                                                 | 38 (73.1)                   | <0.001  |
| • 51-100                                                                                                                            | 18 (13.6)          | 2 (12.5)                   | 0               | 6 (16.2)                                                  | 2 (3.8)                     |         |
| • 101-250                                                                                                                           | 21 (15.9)          | 4 (25)                     | 9 (21.4)        | 5 (13.5)                                                  | 8 (15.4)                    |         |
| • 251-500                                                                                                                           | 20 (15.2)          | 0                          | 11 (26.2)       | 3 (8.1)                                                   | 1 (1.9)                     |         |
| • >500                                                                                                                              | 46 (34.8)          | 0                          | 11 (26.2)       | 1 (2.7)                                                   | 3 (5.8)                     |         |
| Did trainees express concerns regarding their safety and risk of exposure to COVID-19? (n=279)                                      |                    |                            |                 |                                                           |                             |         |
| • Yes                                                                                                                               | 107 (81.1)         | 11 (68.8)                  | 23 (54.8)       | 34 (91.9)                                                 | 33 (63.5)                   | 0.004   |
| • No                                                                                                                                | 17 (12.9)          | 4 (25)                     | 12 (28.6)       | 1 (2.7)                                                   | 14 (26.9)                   |         |
| • I don't know                                                                                                                      | 8 (6.1)            | 1 (6.3)                    | 7 (16.7)        | 2 (5.4)                                                   | 5 (9.6)                     |         |
| Have any of your trainees tested positive for COVID-19? (n=279)                                                                     |                    |                            |                 |                                                           |                             |         |
| • Yes                                                                                                                               | 29 (22)            | 0                          | 12 (28.6)       | 7 (18.9)                                                  | 2 (3.8)                     | <0.001  |
| • No                                                                                                                                | 94 (71.2)          | 16 (100)                   | 22 (52.4)       | 25 (67.6)                                                 | 49 (94.2)                   |         |
| • I don't know                                                                                                                      | 9 (6.8)            | 0                          | 8 (19)          | 5 (13.5)                                                  | 1 (1.9)                     |         |
| Have any of your teaching faculty tested positive for COVID-19? (n=279)                                                             |                    |                            |                 |                                                           |                             |         |
| • Yes                                                                                                                               | 51 (38.6)          | 0                          | 17 (40.5)       | 12 (32.4)                                                 | 1 (1.9)                     | <0.001  |
| • No                                                                                                                                | 69 (52.3)          | 16 (100)                   | 21 (50)         | 19 (51.4)                                                 | 49 (94.2)                   |         |
| • I don't know                                                                                                                      | 12 (9.1)           | 0                          | 4 (9.5)         | 6 (16.2)                                                  | 2 (3.8)                     |         |
| The COVID-19 pandemic will impact your senior fellows' preparation for performing endoscopy independently after graduation. (n=279) |                    |                            |                 |                                                           |                             |         |
| • Maybe                                                                                                                             | 10 (7.6)           | 2 (12.5)                   | 0               | 3 (8.1)                                                   | 6 (11.5)                    | <0.001  |
| • No                                                                                                                                | 57 (43.2)          | 2 (12.5)                   | 7 (16.7)        | 2 (5.4)                                                   | 13 (25)                     |         |
| • Yes, but will likely graduate as planned                                                                                          | 47 (35.6)          | 6 (37.5)                   | 15 (35.7)       | 16 (43.2)                                                 | 19 (36.5)                   |         |
| • Yes, may need to extend training                                                                                                  | 18 (13.6)          | 6 (37.5)                   | 20 (47.6)       | 14 (37.8)                                                 | 14 (26.9)                   |         |
| • Yes, senior fellows were graduated early due to COVID-19 pandemic demands                                                         | 0                  | 0                          | 0               | 2 (5.4)                                                   | 0                           |         |

| Survey questions                                                                                                                                | Americas;<br><i>n</i> =135 | Southeast<br>Asia;<br><i>n</i> =16 | Europe;<br><i>n</i> =44 | Eastern<br>Mediterranean<br>& African<br>Regions;<br><i>n</i> =41 | Western<br>Pacific;<br><i>n</i> =63 | <i>p</i> -value |
|-------------------------------------------------------------------------------------------------------------------------------------------------|----------------------------|------------------------------------|-------------------------|-------------------------------------------------------------------|-------------------------------------|-----------------|
| Have trainees been asked to assume roles outside of GI? ( <i>n</i> =279)                                                                        |                            |                                    |                         |                                                                   |                                     |                 |
| • Yes                                                                                                                                           | 64 (48.5)                  | 11 (68.8)                          | 34 (81)                 | 18 (48.6)                                                         | 24 (46.2)                           | 0.008           |
| • No                                                                                                                                            | 63 (47.7)                  | 5 (31.3)                           | 6 (14.3)                | 17 (45.9)                                                         | 23 (44.2)                           |                 |
| • Maybe                                                                                                                                         | 5 (3.8)                    | 0                                  | 2 (4.8)                 | 2 (5.4)                                                           | 5 (9.6)                             |                 |
| What has been the overall impact of the COVID-19 pandemic on the endoscopy training? ( <i>n</i> =279)                                           |                            |                                    |                         |                                                                   |                                     |                 |
| • Negative/Strongly negative impact                                                                                                             | 124 (94)                   | 14 (87.6)                          | 39 (92.9)               | 35 (94.6)                                                         | 47 (90.4)                           | 0.001           |
| • No impact                                                                                                                                     | 8 (6)                      | 1 (6.2)                            | 3 (7.1)                 | 1 (2.7)                                                           | 2 (3.8)                             |                 |
| • Positive impact                                                                                                                               | 0                          | 1 (6.2)                            | 0                       | 1 (2.7)                                                           | 3 (5.8)                             |                 |
| Trainees and faculty received formal training on how to care for COVID-19 patients ( <i>n</i> =279)                                             | 107 (81.1)                 | 12 (75)                            | 37 (88.1)               | 23 (62.2)                                                         | 39 (75)                             | 0.09            |
| Trainees and faculty received formal training on how to appropriately use personal protective equipment (PPEs) ( <i>n</i> =279)                 | 126 (95.5)                 | 14 (87.5)                          | 39 (92.9)               | 29 (78.4)                                                         | 42 (80.8)                           | 0.001           |
| What steps were taken to address the impact of the COVID-19 pandemic on endoscopy training* for fellows? ( <i>n</i> =279)                       |                            |                                    |                         |                                                                   |                                     |                 |
| • Allowing trainees to scope at other hospitals/sites                                                                                           | 12 (9.1)                   | 0                                  | 2 (4.8)                 | 1 (2.7)                                                           | 3 (5.8)                             | 0.44            |
| • Allowing trainees to work with multiple faculty members                                                                                       | 39 (29.5)                  | 3 (18.8)                           | 11 (26.2)               | 11 (29.7)                                                         | 12 (23.1)                           | 0.82            |
| • Online or virtual teaching                                                                                                                    | 75 (56.8)                  | 12 (75)                            | 12 (28.6)               | 11 (29.7)                                                         | 18 (34.6)                           | <0.001          |
| • Conserving endoscopy procedures for existing and senior fellows                                                                               | 2 (1.5)                    | 0                                  | 1 (2.4)                 | 0                                                                 | 0                                   | 0.72            |
| • Use of endoscopy simulators                                                                                                                   | 7 (5.3)                    | 2 (12.5)                           | 6 (14.3)                | 1 (2.7)                                                           | 13 (25)                             | 0.001           |
| • Extension on the training duration                                                                                                            | 0                          | 0                                  | 0                       | 0                                                                 | 1 (1.9)                             | 0.35            |
| • Flexibility in trainee schedules                                                                                                              | 87 (65.9)                  | 7 (43.8)                           | 15 (35.7)               | 19 (51.4)                                                         | 29 (55.8)                           | 0.009           |
| • Gradual easing of restrictions - trainees can now scope                                                                                       | 1 (0.8)                    | 1 (6.3)                            | 0                       | 0                                                                 | 0                                   | 0.09            |
| • Improvement in testing and adequate PPE resulted in resumption of fellows active training                                                     | 1 (0.8)                    | 0                                  | 0                       | 0                                                                 | 0                                   | 0.89            |
| • None of the above                                                                                                                             | 13 (9.8)                   | 1 (6.3)                            | 13 (31)                 | 9 (24.3)                                                          | 10 (19.2)                           | 0.008           |
| The program has developed education focused on helping trainees cope with stress from COVID-19 and improving their well-being. ( <i>n</i> =279) |                            |                                    |                         |                                                                   |                                     |                 |
| • Yes                                                                                                                                           | 91 (68.9)                  | 12 (75)                            | 13 (31)                 | 8 (21.6)                                                          | 15 (28.8)                           |                 |
| • No                                                                                                                                            | 21 (15.9)                  | 4 (25)                             | 24 (57.1)               | 25 (67.6)                                                         | 30 (57.7)                           | <0.001          |
| • I don't know                                                                                                                                  | 20 (15.2)                  | 0                                  | 5 (11.9)                | 4 (10.8)                                                          | 7 (13.5)                            |                 |

\*Recommended to check all that apply.

COVID-19, the coronavirus disease of 2019; GI, gastroenterology; ICU, intensive care unit; PD, program director; PPE, personal protective equipment.
