# Supplementary material for: Impact of COVID-19 on Endoscopy Training: Perspectives from a Global Survey of Program Directors and Endoscopy Trainers
Source: PubMed Central journal article supplement — Clin Endosc. 2021 Sep 30;54(5):678–87. doi: 10.5946/ce.2021.140 (PMC8505182; doi:10.5946/ce.2021.140), 2021-09-30
Supplement: ce-2021-140-suppl7.pdf [file ce-2021-140-suppl7.pdf]

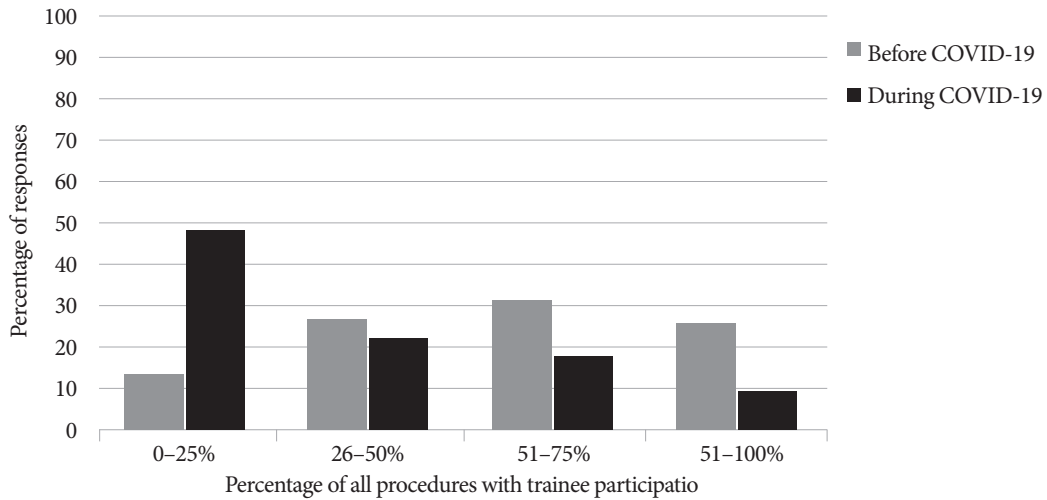

**Supplementary Figure 1.** Percentage of all endoscopy procedures with trainee participation before and during the COVID-19 pandemic. COVID-19, the coronavirus disease of 2019.

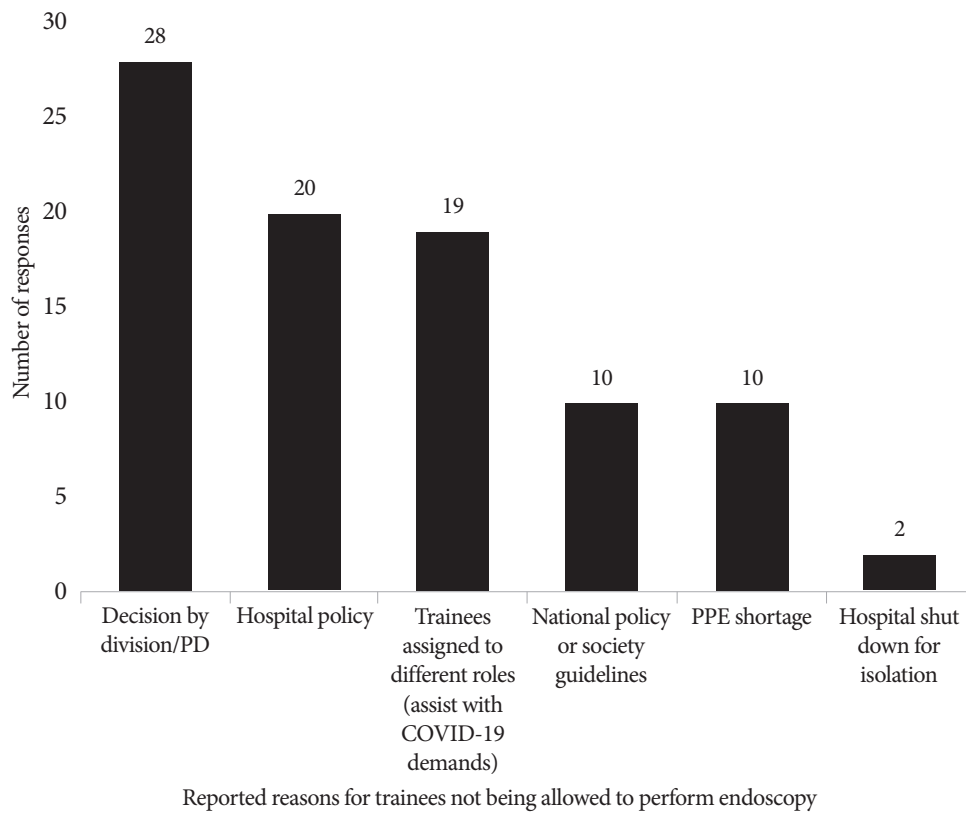

**Supplementary Figure 2.** The primary reason for trainees not being allowed to perform any endoscopy procedures. COVID-19, the coronavirus disease of 2019; PD, program director; PPE, personal protective equipment.
