# Supplementary material for: Impact of COVID-19 on Endoscopy Training: Perspectives from a Global Survey of Program Directors and Endoscopy Trainers
Source: PubMed Central journal article supplement — Clin Endosc. 2021 Sep 30;54(5):678–87. doi: 10.5946/ce.2021.140 (PMC8505182; doi:10.5946/ce.2021.140), 2021-09-30
Supplement: ce-2021-140-suppl8.pdf [file ce-2021-140-suppl8.pdf]

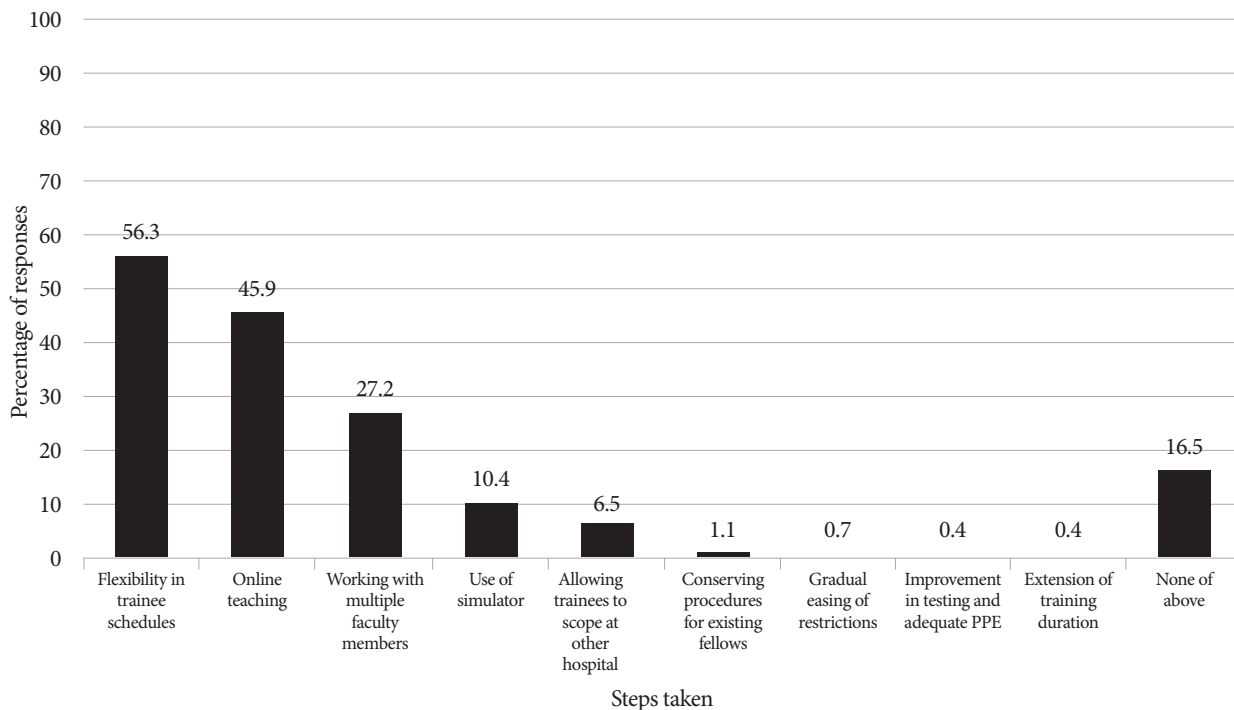

Supplementary Figure 3. Steps taken to address the impact of the COVID-19 pandemic on endoscopy training for fellows.

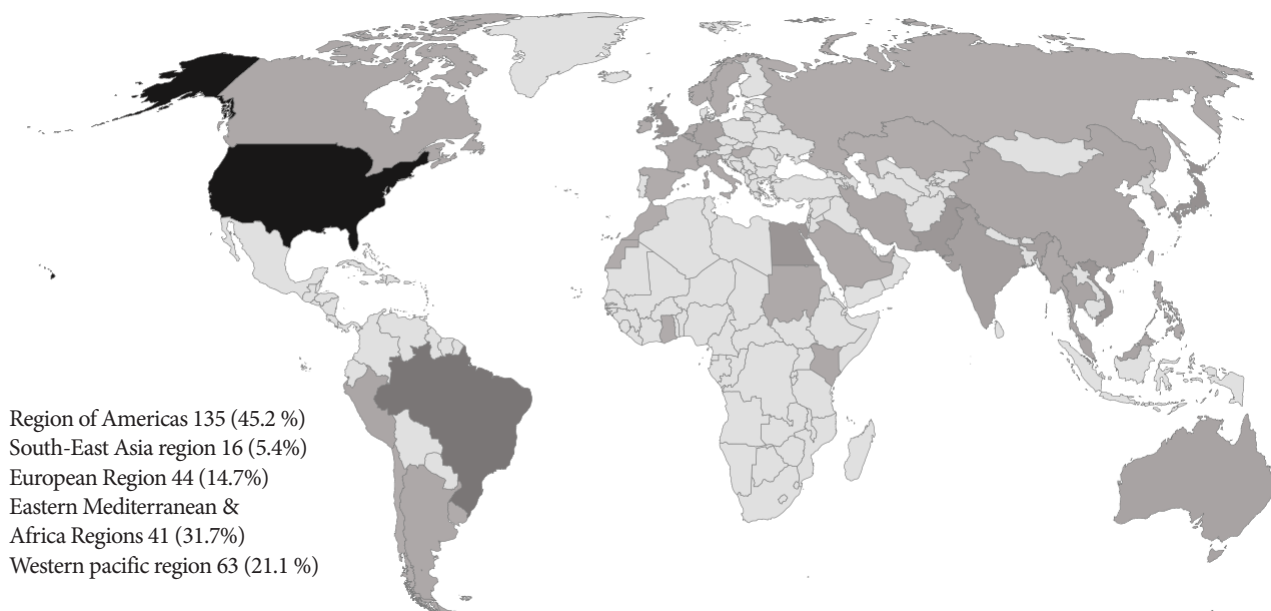

Supplementary Figure 4. Participating endoscopy teaching faculty by country.
