# Supplementary material for: Impact of COVID-19 on Endoscopy Training: Perspectives from a Global Survey of Program Directors and Endoscopy Trainers
Source: PubMed Central journal article supplement — Clin Endosc. 2021 Sep 30;54(5):678–87. doi: 10.5946/ce.2021.140 (PMC8505182; doi:10.5946/ce.2021.140), 2021-09-30
Supplement: ce-2021-140-suppl9.pdf [file ce-2021-140-suppl9.pdf]

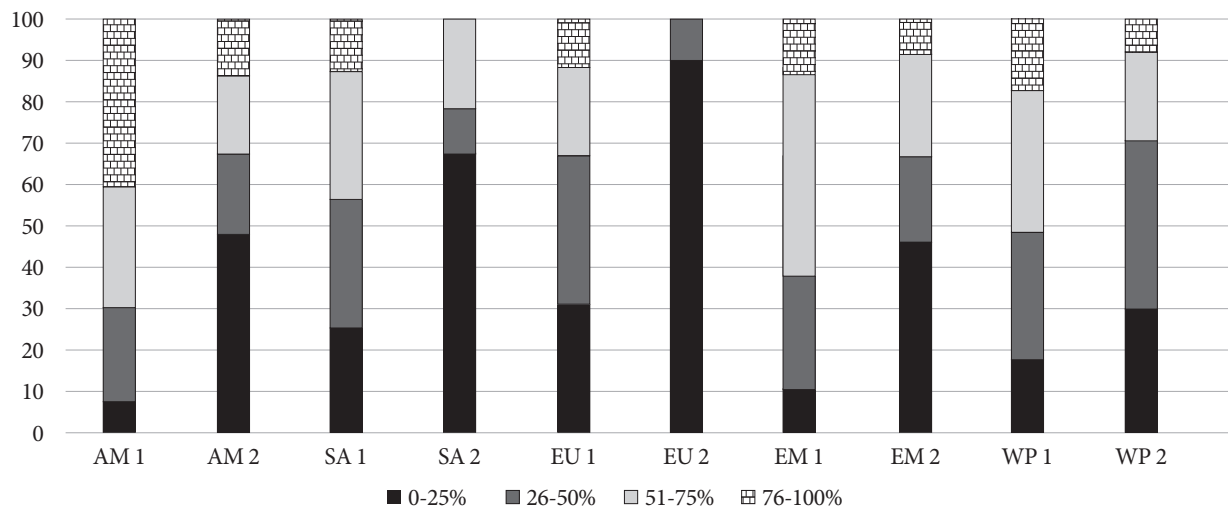

AM 1: Americas region before COVID-19

SA 1: South-east Asia region before COVID-19

EU 1: European region before COVID-19

EM 1: Eastern Mediterranean and Africa regions before COVID-19

WP 1: Western Pacific region before COVID-19

AM 2: Americas region during COVID-19

SA 2: South-east Asia region during COVID-19

EU 2: European region during COVID-19

EM 2: Eastern Mediterranean and Africa regions during COVID-19

WP 2: Western Pacific region before COVID-19

**Supplementary Figure 5.** Percentage of procedures performed by trainees per week before and during COVID-19 pandemic in different WHO regions. COVID-19, the coronavirus disease of 2019.
